# Supplementary material
Source: PubMed Central journal article supplement (PMC8804974)
Supplement: jamapediatr-e215750-s001.pdf [file jamapediatr-e215750-s001.pdf]

1  
2  
3  
4  
5  
6  
7  
8  
9  
10  
11  
12  
13  
14  
15  
16  
17  
18  
19  
20  
21

**Title of Study: Open label placebo for children with functional abdominal pain and irritable  
bowel syndrome: A randomized crossover trial**

**Principle Investigator:** Samuel Nurko, MD, MPH – Children’s Hospital Boston

Other Institutions: Nationwide Children’s Hospital, Columbus, OH, and Children’s Mercy  
Kansas City, MO.

**A. Specific Aims and Objectives**

This study is aimed at investigating the efficacy of open label placebo for symptom relief in  
children with abdominal pain related functional gastrointestinal disorders.

**B. Background and Significance**

Some of the most commonly used drugs for the treatment of FGIDs have potential severe  
adverse effects including cardiac, psychiatric, urinary and gastroenterological problems.  
Moreover, studies have shown an increase in suicidal ideation in adolescents using some of the  
most commonly prescribed drugs for the treatment of FAP.<sup>1,2</sup> As a result the FDA has mandated  
discussing the possible increased risk of suicide among this group of patients. Parents often  
refuse treatment due to the potential life threatening risks.

22 A recent adult study has shown that non deceptive placebo use is beneficial in the treatment of  
23 IBS.<sup>3</sup> In this study, patients who were made aware that they would receive placebo had greater  
24 improvement of symptoms than those in the control group. This study opens the door to the  
25 possible use of non-deceptive placebo for the treatment of FGIDs in other populations including  
26 children. The use of placebo could potentially reduce health risks, decrease costs and increase  
27 parental acceptance. There have been no studies investigating the possible acceptance and  
28 efficacy of using non deceptive placebos for the treatment of FGIDs in children.

29 There are several hurdles to conducting non deceptive placebo studies including ethical issues.  
30 Although adult studies have used non-treatment as control to assess the efficacy of non-  
31 deceptive placebo, not treating children who are suffering of pain is not ethically acceptable. A  
32 possible mean of overcoming these ethical issues it to use placebo as an addition to  
33 conventional treatment. This design would allow assessing the superiority of the addition of  
34 placebo to the conventional treatment and still provide standard treatment for the child's  
35 symptoms. Standard of care of FAP includes use of as needed anticholinergic drugs at times of  
36 pain episodes. We propose a preliminary study aimed at investigating parental acceptance to  
37 the use of non-deceptive placebo and the possible additional effect of non-deceptive placebo  
38 to conventional therapy in children with FAP.

### 39 **C. Preliminary Studies**

40 A meta analysis has shown that 40% of adult patients with IBS improve with the exclusive use of  
41 placebo.<sup>4</sup> Studies on children with FGIDs have confirmed these findings by showing a consistent  
42 high placebo effect in randomized trials.<sup>5,6</sup> The largest randomized clinical trial investigating the

43 efficacy of the use of drugs to treat children with FAP (functional abdominal pain) has shown  
44 that placebo was as effective as the study drug in the treatment of these conditions.<sup>6</sup>  
45 A recent adult study has shown that non deceptive placebo use is beneficial in the treatment of  
46 IBS.<sup>3</sup> In this study, patients who were made aware that they would receive placebo had  
47 greater improvement of symptoms than those in the control group. This study opens the door  
48 to the possible use of non-deceptive placebo for the treatment of FGIDs in other populations  
49 including children. The use of placebo could potentially reduce health risks, decrease costs and  
50 increase parental acceptance. There have been no studies investigating the possible acceptance  
51 and efficacy of using non deceptive placebos for the treatment of FGIDs in children.

#### 52 **D. Design and Methods**

##### 53 **a. Study Design and Timeline**

54 This is a prospective multicenter crossover study of the efficacy of administering placebo  
55 without deception. Eligible patients will complete a 1 week of observation prior to  
56 randomization to one of two arms: a) *Group 1*: Control period (CP) for 3 weeks, followed by  
57 open placebo (OP) for 3 weeks and b) *Group 2* : OP for 3 weeks, followed by a CP of 3 weeks,  
58 Our aim is to recruit at least 30 subjects in total across all sites (see below). Enrollment at  
59 Children’s Hospital Boston will occur on Fegan 5, where Dr. Nurko and his colleagues see  
60 patients regularly. Prior to enrollment the physician will brief potential subjects on what a  
61 placebo is and how it works. The placebo will be described as an inert or inactive liquid, without  
62 any medication in it (see below). Additionally, subjects will be told that “liquid placebo has  
63 been shown in rigorous clinical testing to lead to improvement of pain symptoms possibly by an  
64 effect on the interaction between the body and the mind.” Following a description of placebos

65 and the study process, patients who give informed consent and fulfill the inclusion and  
66 exclusion criteria will be randomized into two phases: A 1.5 ml of placebo suspension twice  
67 daily, and a third dose if the pain has not resolved or B) no placebo. In both phases, subjects will  
68 be prescribed a rescue medication. The rescue medication prescribed will be hyoscyamine (an  
69 anticholinergic), which subjects may use to control pain on an as needed basis in both phases.  
70 Hyoscyamine is considered a standard of care medication for the treatment of functional  
71 gastrointestinal disorders.

72 Standard of Care - While there are no guidelines for the treatment of Functional Abdominal  
73 Pain, physicians most commonly prescribe an anticholinergic as the first line in treatment. For  
74 that reason, hyoscyamine, will be used as the rescue medication for subjects in this study.  
75 Subjects enrolled in this study will have a clinical indication to be prescribed hyoscyamine, per  
76 their primary gastroenterologist.

#### 77 Specific methods

78 Patients will complete 1 week of observation and will then return to clinic. Eligible patients will  
79 then be randomized to one of two arms: a) *Group 1*: Control period (CP) for 3 weeks, followed  
80 by open label placebo (OLP) for 3 weeks and b) *Group 2* : OP for 3 weeks, followed by a CP of 3  
81 weeks There will be no washout period between both treatments phases as there should be no  
82 carryover effect of an inactive compound.

83

84 Visit 1: First encounter (Day 0/Week 1): Prior to the first encounter, the medical record of  
85 children seen in clinic will be reviewed to assess study eligibility. Eligible patients may also be  
86 sent a recruitment letter. The first encounter will occur in gastroenterology clinic.

- 87 1- A member of the research team will approach subjects in one of the gastroenterology  
88 clinics to introduce the study and to obtain consent.
- 89 a. Families do not have to decide on the day approached if they would like to  
90 participate in the study. They can take the consent home and consider their  
91 participation at their leisure. They will be informed, however, that if they decide  
92 to participate in the study after the fact, that they will not be able to start the  
93 hyoscyamine until the completion of the 7-day baseline phase.
- 94 2- Daily diary sheets will be provided for the baseline week 1. . This diary will be used to  
95 gather baseline data (1<sup>st</sup> week of study)
- 96 3- The daily diary will include the visual analogue scale, and the Word-Graphic Rating  
97 Scale, which will help children to rate the severity of their abdominal pain. The subject  
98 will be instructed to rate the abdominal pain on a rating scale every day at bedtime.

99

100 Visit 2: Second Encounter (start of week 2)

- 101 1- Subject will be randomized into one of the 2 arms of the study
- 102 2- If randomized to Phase A, a three week supply of hyoscyamine and placebo will be  
103 provided to the family
- 104 3- If randomized to Phase B, only a three week supply of hyoscyamine will be provided.
- 105 4- Subjects will be asked a standardized set of questions regarding diagnosis, history and  
106 characteristics of pain.
- 107 5- Subjects will complete the Pediatric Quality of Life Questionnaire.

108 6- Subjects will be given a three week daily diary to complete which will be two pages each  
109 day inquiring about symptoms and the Diary will also be used by subjects to indicate  
110 whether hyoscyamine was used that day.

111 7- Collection of saliva for COMT testing  
112

113 Visit 3: Third encounter (start of week 5): Will occur in gastroenterology clinic.

114 1- Family returns completed diary forms from 1 week of baseline and 3 weeks of study (the  
115 3 weeks will either be for Phase A or Phase B).

116 2- Clinical evaluation.

117 3- Subjects will complete the Pediatric Quality of Life Questionnaire.

118 4- Physician addresses any study concerns and questions.

119 5- Patients will then be crossovered to the opposite treatment, either placebo with rescue  
120 medication, or rescue medication alone  
121

122 Visit 4: Fourth encounter (End of week 7): Will occur in gastroenterology clinic.

123 1- Family returns completed diary forms for alternate phase of study and unused  
124 medication and placebo.

125 2- Clinical evaluation.

126 3- Subjects will complete the Pediatric Quality of Life Questionnaire

127 4- Family and subject are thanked for participating in the study.  
128

129 At the conclusion of the study at visit 4 we will schedule four follow up appointments at 3-  
130 week, 3 months, 6 months, and 12 months after the completion of the study to follow up  
131 clinically with the patient.

132 If the patient has demonstrated significant improvement during the placebo treatment phase  
133 of the study, at the 3-week follow up appointment after completing the study, the family will  
134 be given the option to restart the open label placebo for a maintenance period of 6 months.  
135 Patients who elect to take part in the additional 6 month maintenance phase will be seen back  
136 in the gastroenterology clinic after 1 month, 2 months, 4 months, and 6 months to assess  
137 progress during this extended open label treatment phase. This 6-month open label placebo  
138 extension is entirely optional and will be offered primarily at the request of the patient and/or  
139 family in an effort to offer an effective therapy with limited potential for side effects.

140 All subjects will have the option to discontinue their participation in this study at any point.  
141 Should a subject begin in the placebo arm, see significant benefits from the study and as a  
142 result choose not to cross-over to the non-placebo arm, they will have the option to do so. If  
143 they do choose to do so, they will be provided with the placebo from the study. Our  
144 recruitment goal was adjusted to account for subject attrition.

#### 145 **b. Patient Selection and Inclusion/Exclusion Criteria**

146  
147 The informed consent process will occur in the gastroenterology clinic during the patient's  
148 scheduled doctor visit. Prior to each clinic, a member of the research team will review the  
149 schedule of patients and review the medical chart for each patient to screen for eligible  
150 subjects. Those children with a diagnosis of FAP or IBS will be considered for this study.

151 Potential subjects will be approached in the exam room following the physician's visit. A  
152 member of the research team will approach subjects to introduce the study and to obtain  
153 consent. The study will be introduced as an open label trial of placebo and the potential risks  
154 and benefits of placebo will be outlined. The families recruited will be given adequate time to  
155 read the form and ask questions prior to obtaining a signature. If the family consents to entry  
156 into the study, written consent will be obtained from the parent/guardian of every subject and  
157 written assent will be obtained for all subjects between the ages of 8 and 18. A copy of the  
158 signed consent form will be given to the signers. The subject's parent(s) or guardian(s) may  
159 request that the subject be removed from the study at any time. In addition, the investigator  
160 may withdraw a subject from the study if he/she determines that it is in the subject's best  
161 interests. Medical care will not be altered whether or not consent is obtained.

162

163 In addition to approaching potential subjects in the gastroenterology clinic, patients may also  
164 be recruited through an informational flyer or online posting. Both briefly outline the purpose  
165 of the study and provide contact information for the study team.

166 Inclusion criteria:

- 167 1. Age 8 to 18 years.
- 168 2. Diagnosis of functional abdominal pain, or irritable bowel syndrome made by a  
169 pediatric gastroenterologist according to Rome III Criteria.
- 170 3. Mean daily intensity of pain of 25 mm in the week prior to the initiation of the study,  
171 based on the Word-Graphic Rating Scale score.



- 172 4. Children will not be excluded if they are adhering to any specific diet. Children will  
173 be asked to report any specific established diet prior to the study or dietary  
174 modifications that could have been made during the course of the study.
- 175 5. Normal laboratory tests including complete blood count, erythrocyte sedimentation  
176 rate, albumin, serum amylase, lipase, liver enzymes, urine analysis, stool  
177 examination for occult blood and ova and parasites one month prior the initiation of  
178 the study. Urinary culture will be obtained if the symptoms or urinalysis suggest the  
179 possibility of a urinary infection.
- 180 6. Normal lactose breath test or history of lack of resolution of symptoms on a lactose-  
181 free diet (2 weeks).
- 182 7. Patients receiving psychological treatment, hypnosis, biofeedback or guided imagery  
183 will not be excluded of the study if those were started at least one month prior to  
184 the initiation of the study and are not planned to be discontinued during the length  
185 of the trial. Patients will need to be prescribed hyoscyamine (clinically indicated) to  
186 be considered for this study, as the placebo will be in addition to their prescribed  
187 medication.

188

189 Exclusion criteria:

- 190 1. Inclusion criteria not met.
- 191 2. Evidence of organic gastrointestinal disease, hepatic disorders, urinary or cardiac  
192 disease.
- 193 3. Children below the 5th percentile for weight or height.

- 194 4. Hemocult positive stools.
- 195 5. Patients with diagnosis of Inflammatory Bowel Disease, hyperthyroidism, CHF,  
196 cardiac arrhythmias, prostatic hypertrophy, autonomic neuropathy, biliary tract  
197 disease, children with spastic paralysis or chronic lung disease (we will consult a  
198 pulmonologist concerning the inclusion of children with chronic lung disease).
- 199 6. Patients who are taking any of the following drugs: AbobotulinumtoxinA,  
200 Acetylcholinesterase Inhibitors (Central), Cannabinoids, OnabotulinumtoxinA,  
201 Potassium Chloride, Pramlintide, RimabotulinumtoxinB, Secretin. Patients receiving  
202 antidepressant or anticholinergic drugs will be excluded from the study. PPIs will be  
203 allowed as long as the patient had been on a stable dose for at least 12 weeks.
- 204 7. Patients planning to change their diet during the time of the study will be excluded.  
205 Children will be asked to report any specific established diet prior to the study or  
206 dietary modifications that could have been made during the course of the study.
- 207 8. Patients planning to start psychological treatment, hypnosis, biofeedback, or guided  
208 imagery during the course of the study or have started any of these within the  
209 month prior to consent.
- 210 9. The participant is pregnant or is planning to become pregnant throughout the  
211 course of the research study

212

### 213 **c. Description of Study Treatments or Exposures/Predictors**

214 Description of Placebo: The Placebo will be in liquid form. It will be a Humco Brand simple  
215 syrup. Patients will take 1.5 ml of the Placebo in the morning and 1.5 ml at night using a plastic

216 3 ml syringe. The placebo will be stored and dispensed by the Children's Hospital Boston  
217 Pharmacy,

218 Description of Rescue Medication: Hyoscyamine will serve as the rescue medication for this  
219 study. Hyoscyamine works by decreasing the motion of the stomach and intestines and the  
220 secretion of stomach fluids, including acid. Subjects will be provided with a prescription for  
221 Hyoscyamine pills to use on an as needed basis. Families will be responsible for the cost of this  
222 medication. Children ages 8 through 21 may not exceed 4 pills per day.

223  
224 Using 4 pills is much lower than the highest recommended dose. In children <12 the maximum  
225 recommended dose is 0.75 mg, and in those > 12 years it is 1.5 mg The dose we are  
226 recommending here is 0.6 mg. Even if the patients take more it is unlikely they will overdose.  
227 Patients will be instructed not to take more than the recommended number of pills. If there is a  
228 nocebo effect, or more pain, they will be instructed to contact the investigative team. This  
229 medication has anticholinergic properties so the families will be instructed on those side  
230 effects. The first point of contact if there is increasing pain will be the research team.  
231 Patients/families will be instructed to go to the ED if the investigator thinks there are  
232 anticholinergic side effects, or judges that the pain merits consultation to rule out surgical  
233 problems. This has been added to the Risk section of the protocol.

234  
235 Catecholamines play a key role in cognitive<sup>7</sup>, behavioral<sup>8</sup>, sensory<sup>9</sup>, endocrine<sup>10</sup> and  
236 autonomic nervous system regulation<sup>11</sup>. Thus functional polymorphisms in catechol-O-  
237 methyltransferase (*COMT*), an enzyme that metabolizes catecholamines may be associated

238 with a variety of clinical conditions. The most extensively studied *COMT* single nucleotide  
239 polymorphism (SNP), rs4680 or val158met, is a G to A transition that encodes a valine (val) to  
240 methionine (met) substitution at amino acid 158 in the membrane form of the enzyme and  
241 amino acid 108 in the secreted form<sup>12</sup>. The G or val variant is 3-4 times more enzymatically  
242 active than the A or met variant<sup>13</sup>. The differences in enzymatic activity are inversely correlated  
243 to endogenous levels of dopamine<sup>14</sup> and other *COMT* substrates including epinephrine,  
244 norepinephrine and catechol estrogens<sup>15,16</sup>, both at rest and with stress induced by exercise<sup>17</sup>  
245 or cardiac surgery<sup>18</sup>. In turn, variation in the levels of these signaling molecules have been  
246 related to functional pain syndromes<sup>9</sup>, as well as in irritable bowel syndrome in adults<sup>19</sup>.

247         Based on a study conducted in adults with IBS<sup>19</sup>, in which IBS patients homozygous for  
248 the *COMT* val158met methionine allele (met/met) were the most responsive to placebo  
249 treatment, we hypothesize that the *COMT* functional val158met polymorphism will be a  
250 predictor of placebo effects.

#### 251 **Specific aspects of the encounters:**

#### 252 **Design of a script and validation of the script to introduce the placebo phase**

253 A defined script to approach each family/individual was designed. Different scripts were  
254 designed specifically for each group and visit type including enrollment, randomization to  
255 either group and crossover. The script for the placebo group included the following concepts:

- 256         a) the placebo effect is very powerful in randomized clinical trials;
- 257         b) although we have much more to learn about how it works, we do know that it takes  
258 advantage of the mind-body connection;
- 259         c) one reason for its effect may be that the body automatically responds to taking the  
260 placebo suspension and activates responses that help reduce pain and swelling;

- 261 d) the placebo jump-starts this beneficial response;
- 262 e) another good thing about a placebo is that you do not need to believe in it for it to
- 263 work – a positive attitude helps, but is not necessary;
- 264 f) however, for the placebo to work, it is important that you to take the suspension on a
- 265 regular basis, and finally
- 266 g) the great thing about placebos is that there are no side effects.

267

268

269 The script were practiced to be sure they were delivered in the same way to all individuals, and

270 given the multicenter nature of the trial a video was created and distributed to the centers. One

271 of the members of the BCH team then witnessed and validated to scripts at the other sites to

272 ensure uniformity.

273

274

#### 275 d. Definition of Primary and Secondary Outcomes/Endpoints

276 Primary Outcome Measures:

277

##### 278 **Primary outcome**

279 The primary outcome that will be used will the mean daily pain (0-100 VAS scale). It will be

280 assessed at the end of the 3-week and 6-week treatment periods (at the end of each treatment

281 arm prior to switching to the next arm of treatment) (see statistical section below)

282

283

## 284 **Secondary outcomes**

285 The study will assess two global outcome measures of patient's symptomatic response:  
286 *satisfactory relief of symptoms and overall improvement*. Both patient reported outcome  
287 (PROs) measures have been widely studied<sup>20</sup> and used in adult and pediatric studies including a  
288 large randomized clinical trial conducted by our research group on a similar group of patients.<sup>6</sup>  
289 Landmark studies leading to the approval of medications for IBS have used adequate or  
290 satisfactory relief of symptoms and overall improvement as outcome measures.<sup>21,22</sup> Following  
291 the design of most high quality clinical trials in IBS both global assessment questions will be  
292 analyzed as binary outcomes.<sup>23</sup> Both binary improvement endpoints have shown excellent  
293 construct validity and were not impacted by baseline severity in adult studies<sup>24,25</sup>, and have  
294 demonstrated adequate psychometric properties in pediatric studies conducted by our group.<sup>26</sup>  
295 Clinical global improvement will be assessed by obtaining symptomatic improvement using the  
296 following questions:

- 297 1- Satisfactory relief: "Overall how do you feel your problem is?" Patients will select an  
298 answer from a list of 3 possible answers (better, same, or worse). In order to establish a  
299 binary assessment of outcome patients answering: "better" will be compared to  
300 "worse" and "same"
- 301 2- Satisfaction with treatment: "How did the medication relieve your pain?" Patients will  
302 select an answer from a list of 5 possible answers (excellent, good, fair, poor, or failed).  
303 In order to establish a binary assessment of outcome patients answering: "excellent"  
304 and "good" will be compared with those answering: "fail", "poor" and "failed".

305

306 Other secondary outcomes were the use of rescue medication (assessed by pill count) , change  
307 in disability, anxiety and quality of life before and after the placebo or the control period.

308

### 309 **Evaluation tools and questionnaires**

310 1- Demographic Information (age, race, gender).

311

312- QPGS.- Questionnaire on Pediatric Gastrointestinal Symptoms: Rome III version (*QPGS-RIII*),

313 Validated questionaire to establish Rome criteria ()

314- Word-Graphic Rating Scale is a simple, valid, sensitive and developmentally appropriate self-

315 report test to assess pain intensity in children. It consists of a 10 cm horizontal scale anchored

316 by the words “no pain”, “little pain”, “medium pain”, “large pain” and the “worst possible pain”

317 at regular intervals from left to right end of the line respectively.

318- Functional Disability Inventory consists of 15 self-report items assessing the perceived degree

319 of physical and psychosocial difficulty in functioning due to the patient’s health status. This

320 inventory has high levels of internal consistency, construct validity and high levels of test–retest

321 reliability for patients with recurrent abdominal pain. The FDI is sensitive to changes in patient

322 status subsequent to medical treatment making it an appropriate instrument for outcome

323 measure.

324- Pediatric quality of life.- Validated age appropriate questionnaire to assess quality of life in

325 children

3266- Pediatric Quality of Life GI Questionnaire- the GIPedsQoL is a validated age appropriate  
327 questionnaire that was used in multiple studies of GI pain in children {Kovacic, 2017  
328 #861;Krasaelap, 2020 #1128}

3297- RCADS.- The Revised Child Anxiety and Depression Scale (RCADS) is a 47-item, youth **self**-report  
330 questionnaire with subscales including: separation anxiety disorder, social phobia, generalized  
331 anxiety disorder, panic disorder, obsessive compulsive disorder, and low mood (major  
332 depressive disorders

3338- CDI. Children's Depression Inventory 2™ (CDI 2) is a brief self-report test that helps assess  
334 cognitive, affective and behavioral signs of depression in children and adolescents

3359- Children's Somatization Inventory assesses the extent of children's somatic complaints on the  
336 previous two weeks. The CSI had good concurrent validity with another self-report measure of  
337 somatic symptoms and a low but significant correlation with parents' reports of their children's  
338 somatic symptoms on the parent version of the CSI. A total score is obtained by summing the  
339 ratings of its 35 questions and can range from 0 to 140.5-

34010- To assess expectations of success the question: "How well do you think the treatment will work  
341 in a scale 1-10" will be asked at the beginning of each arm of the study

342

### 343 **Informational Pamphlet**

344

345 A 1-page informational pamphlet will be given to subjects and their families. This short  
346 pamphlet provides additional information about the placebo effect and the ability of placebo  
347 treatments to provide symptom relief for patients with certain conditions. The aim of this



348 pamphlet it to provide subjects and their families with standardized and consistent background  
349 information on the placebo effect.

350

351

#### 352 **E. Adverse Event Criteria and Reporting Procedures**

353 Adverse events will be considered as significant deviations from normal health, especially any  
354 gastrointestinal symptoms which require hospitalization. If health issues arise in any subjects  
355 we will refer them to their primary care physician. Treatment will be made available to the  
356 subject at Children's Hospital Boston should they choose to see us. Cost of treatment will be  
357 the responsibility of the patient. The investigator may choose to remove these subjects from  
358 the study.

359 All adverse events will be evaluated and reported on case report forms by Dr. Samuel Nurko on  
360 a daily basis. He will record any adverse events, and Children's Hospital will be the  
361 coordinating center., The chair of the DSMB will receive the information from all centers on a  
362 monthly basis, unless serious in which case they will be reviewed by the DSMB within 72 hours.

363 All adverse events will be reported to the committee on clinical investigation within 7 days.

364 Severe adverse events will be reported within 24 hours. Once a report is issued, responses such  
365 as suspensions will be quickly verbally communicated to study investigators.

366 The DSMB will be responsible for monitoring the data, and will be involved in the interim  
367 analysis if necessary. We do not anticipate any interim analysis for early discontinuation for  
368 efficacy due to the small sample size and the descriptive and exploratory nature of the study.

369 After half the patients are enrolled, an interim analysis will be performed primarily focused on

370 adverse events, data quality and completeness, and study accrual. For the interim analysis, a  
371 committee will be formed comprised of two physicians and one biostatistician, none of whom  
372 are involved in the study. The trial may be discontinued at any time at the recommendation of  
373 the investigator or Data Safety and Monitoring Board (DSBM) based on a significant number of  
374 severe adverse events of similar nature.

375

376 **Stopping rules:**

377 The stopping rules will be the following: a) Worsening of the pain to the point that the  
378 parent/child think is unbearable  
379 b) Visit to the ED because of the pain  
380 c) Admission to the hospital because of the abdominal pain.  
381 d) Development of vomiting or weight loss

382

383 The DMSB may recommend stopping the trial before its planned end for any of the following  
384 reasons:

385 a) Placebo administration to patients suffering from FGIDs worsens the pain experienced  
386 b) adherence to trial protocol may be below acceptable goals, such that the ability of the trial to  
387 achieve its goals would be severely compromised or  
388 c) adverse events may be unacceptably high.

389 The investigators from the respective sites have a well-established relationship working  
390 collaboratively in the area of pediatric gastrointestinal research. If at any point an adverse  
391 event or new development arise at any of the sites, the principal investigator of that site will

392 verbally communicate the findings or data to the corresponding site within 24 hours. Any follow  
393 up information or recommendations of the IRB will be forwarded as it is received. All data  
394 communicated between sites will not have identifiers and PHI attached. Subjects will be  
395 referred to by their assigned study ID number only in all communications.

396 In the event of an injury resulting directly from a patient's participation in this research study,  
397 medical treatment will be provided if the injury is reported in a timely manner to the Principal  
398 Investigator, Dr. Samuel Nurko, and the research team. If any research-related injury occurs,  
399 you/your child should contact research staff using the phone numbers provided at the end of  
400 this form to report the incident. Provision of such medical care will not imply any negligence or  
401 other wrongdoing on the part of Boston Children's Hospital or any of the physicians or other  
402 personnel involved in the study (in Boston or a coordinating center). Where applicable, BCH  
403 reserves the right to seek payment from third-party payers for any medical care or services  
404 rendered. The Hospital has no program to provide the research participants with any additional  
405 compensation as a result of any such injuries.

406

#### 407 UNFORESEEN INJURIES

408 The use of placebo's in children and adolescents with functional gastrointestinal disorders is not  
409 well studied and is not an approved treatment. It is possible that there may be some side  
410 effects or risks with the use of the placebo that are not yet known. Sometimes, during the  
411 course of a study, we may learn new information about the placebo that might change whether  
412 or not the participants want to continue in the study. If this happens, the Principal Investigator

413 (Dr. Samuel Nurko) will tell the participants about it in a timely manner, and they will be given  
414 an opportunity to withdraw from the study.

415 Additionally, there may be an additional unforeseeable risk to participants who are pregnant or  
416 become pregnant throughout the course of the study. The use of placebo in pregnant women  
417 has not been extensively studied and could carry a risk to the embryo or fetus, which is  
418 currently unforeseeable. If the participant is or becomes pregnant throughout the course of the  
419 study, they will be requested to inform Research Staff as soon as possible.

420 If significant new findings occur during the course of the research that may relate to the  
421 subject's

422 willingness to participate, such information will be disclosed to them in a timely manner and  
423 they will be given the opportunity to withdraw at that time and will be reminded it will be with  
424 no consequences (Just as if they were to withdraw at any other time)

425

426 This information is available in the ICF.

427

#### 428 **F. Data Management Methods**

429 The diary forms and questionnaires will be identified by a study ID number and not include  
430 subject names. The Study ID number will be a 3 digit number including one random digit and  
431 will not in any way be derived from personal patient information. The data will be analyzed as a  
432 whole by the statistical department at Children's Hospital Boston; individual survey results will  
433 not be disclosed. All links to individual subjects will be deleted at the end of data collection.  
434 Data will be stored on a password-protected database that only the research staff will have

435 access to. The data from all institutions will be transferred to Children’s Hospital Boston, and  
436 data transfer agreements will be in place.

#### 437 **G. Quality Control Methods**

##### 438 Possible Risks

439 Risks of PLACEBO:

440 Some research studies have shown that subjects may have a negative response to the use of  
441 placebo.<sup>30</sup> In studies where subjects are not told whether they will receive medication or a  
442 placebo some subjects in the placebo group will experience the side effects associated with  
443 medication given in that particular study. Other studies have shown that subjects who enter a  
444 study with negative expectations (or a pessimistic attitude) may also have a negative response  
445 to placebo.<sup>31,32</sup>

446 There is also a potential for the participant and family members to loose trust in the  
447 participant’s gastroenterologist who is dispensing a placebo to treat their problem. There is  
448 limited knowledge to date regarding children’s perception of placebos. The participant and  
449 family members will be reassured that they are being recruited into this study because their  
450 child’s primary gastroenterologist believes there is a possibility of symptom improvement from  
451 their child’s participation.

452 GENERAL RISKS:

453 The participant will receive a prescription for hyoscyamine at the beginning of this trial, but will  
454 be asked to hold off on taking the medication for the first 7 days (baseline phase). There is a risk  
455 here that the participant could experience symptoms during this period, and we are asking that  
456 they, if possible, delay taking the rescue medication until the first phase of the trial begins in

457 order to get an accurate baseline measurement. The participant and family will be asked to  
458 delay hyoscyamine usage, but will not be forced to delay treatment should the symptoms be  
459 unbearable.

460  
461 Due to the possibility of a breach of confidentiality personal identifiers (other than date of birth  
462 and gender) will be removed from all documents before they are placed in the central research  
463 record to insure confidentiality. Subjects will be assigned an identification number, which will  
464 be used in place of personal identifiers. The study database will be password protected and all  
465 information will be handled confidentially. To minimize the risks associated with placebo,  
466 subjects will be provided with rescue medication to take on an as needed basis.

467 This study involves filling out questionnaires on quality of life and pain. It is possible that filling  
468 out questionnaires may not be comfortable for the patient so they will be informed verbally  
469 and through the ICF that this is voluntary and it is not absolutely mandatory that they fill out  
470 the questionnaires. They will just be asked to fill out as many as they feel comfortable with.

#### 471 Possible Benefits

472 There is the possibility that subjects will feel better and have improved symptoms following  
473 participation in this study. Subjects may also benefit by participating in this study because the  
474 results will be used to benefit future patients and their medical treatment.

### 475 **H. Data Analysis Plan, Statistical Power and Sample Considerations**

#### 476 **I. Power Analysis**

477 J. The within-subjects design of the study allowed each participant to serve as his or her  
478 own control, which tends to increase statistical power. We used G\*Power 3 software to

479 conduct the power analysis. Using a two-tailed test with alpha set at 5%, we calculated  
480 that a repeated measures analysis of variance with a sample size of 30 would provide  
481 99% power to detect large effects (e.g.,  $\eta^2_p = .14$ ), and 75% power to detect medium  
482 effects (e.g.,  $\eta^2_p = .06$ ).

#### 483 K. **Statistical Analysis**

484 Values will be expressed as mean + SD when normally distributed, or as medians if  
485 applicable. For the categorical outcomes of interest, either a Fisher's Exact test or a chi-  
486 square test will be used. Each of the outcomes will be analyzed separately. Paired tests  
487 will be used when comparing baseline values to values after the different interventions .  
488 Statistical significance will be set at  $p < 0.05$ .

489 As an assessment as to the necessary inclusion of potential covariates, the drug therapy  
490 and the drug + placebo groups will be compared on descriptive variables (e.g., age, etc.).  
491 If the groups are statistically different on any of these variables, then they will be  
492 included as covariates in subsequent analyses.

493 The order of the two conditions (open label placebo vs. no treatment control) will be  
494 counterbalanced to minimize order effects methodologically (we also controlled for  
495 order effects statistically, as detailed below). The primary outcome measure will mean  
496 daily pain (0-100 VAS scale). We will compare mean daily pain scores during the 3-week  
497 open label placebo condition with mean daily pain during the 3-week no treatment  
498 control condition using a repeated measures analysis of variance. In addition, we will  
499 control for treatment order and for mean daily pain during the 1-week baseline period  
500 by including those variables in the model as covariates. The model will also include the

501 interaction between order and treatment condition, as well as the interaction between  
502 baseline pain and treatment condition, thus controlling statistically for these interaction  
503 effects as well. Effect sizes will be computed using partial eta-squared ( $\eta^2_p$ ), which can  
504 be interpreted as the percent of variance in the dependent variable that can be  
505 accounted for by the independent variable, after controlling for all other variables in the  
506 model. By convention,  $\eta^2_p = .01$  is considered a small effect,  $\eta^2_p = .06$  is considered  
507 medium and  $\eta^2_p = .14$  is considered large

508

509

510

## 511 **References**

- 512 1. Boylan K, Szatmari P. Review: antidepressants may increase risk of self-harm or suicidal  
513 behaviour in children and adolescents. *Evidence-based mental health*. Aug  
514 2007;10(3):89.
- 515 2. Hammad TA, Laughren T, Racoosin J. Suicidality in pediatric patients treated with  
516 antidepressant drugs. *Archives of general psychiatry*. Mar 2006;63(3):332-339.
- 517 3. Kaptchuk TJ, Friedlander E, Kelley JM, et al. Placebos without deception: a randomized  
518 controlled trial in irritable bowel syndrome. *PloS one*. 2010;5(12):e15591.
- 519 4. Ford AC, Moayyedi P. Meta-analysis: factors affecting placebo response rate in the  
520 irritable bowel syndrome. *Alimentary pharmacology & therapeutics*. Jul 2010;32(2):144-  
521 158.



- 522 5. Francavilla R, Miniello V, Magista AM, et al. A randomized controlled trial of  
523 Lactobacillus GG in children with functional abdominal pain. *Pediatrics*. Dec  
524 2010;126(6):e1445-1452.
- 525 6. Saps M, Youssef N, Miranda A, et al. Multicenter, Randomized, Placebo-Controlled Trial  
526 of Amitriptyline in Children With Functional Gastrointestinal Disorders.  
527 *Gastroenterology*. Jul 30 2009.
- 528 7. Tunbridge EM, Harrison PJ, Weinberger DR. Catechol-o-methyltransferase, cognition,  
529 and psychosis: Val158Met and beyond. *Biol Psychiatry*. Jul 15 2006;60(2):141-151.
- 530 8. Lancaster TM, Linden DE, Heerey EA. COMT val158met predicts reward responsiveness  
531 in humans. *Genes Brain Behav*. 2012;11(8):986-992.
- 532 9. Diatchenko L, Slade GD, Nackley AG, et al. Genetic basis for individual variations in pain  
533 perception and the development of a chronic pain condition. *Hum Mol Genet*. Jan 1  
534 2005;14(1):135-143.
- 535 10. Alexander N, Osinsky R, Mueller E, et al. Genetic variants within the dopaminergic  
536 system interact to modulate endocrine stress reactivity and recovery. *Behav Brain Res*.  
537 Jan 1 2011;216(1):53-58.
- 538 11. Esler M. The 2009 Carl Ludwig Lecture: Pathophysiology of the human sympathetic  
539 nervous system in cardiovascular diseases: the transition from mechanisms to medical  
540 management. *J Appl Physiol*. Feb 2010;108(2):227-237.
- 541 12. Lachman HM, Papolos DF, Saito T, Yu YM, Szumlanski CL, Weinshilboum RM. Human  
542 catechol-O-methyltransferase pharmacogenetics: description of a functional

- 543 polymorphism and its potential application to neuropsychiatric disorders.  
544 *Pharmacogenetics*. Jun 1996;6(3):243-250.
- 545 13. Lotta T, Vidgren J, Tilgmann C, et al. Kinetics of human soluble and membrane-bound  
546 catechol O-methyltransferase: a revised mechanism and description of the thermolabile  
547 variant of the enzyme. *Biochemistry*. Apr 4 1995;34(13):4202-4210.
- 548 14. Chen J, Lipska BK, Halim N, et al. Functional analysis of genetic variation in catechol-O-  
549 methyltransferase (COMT): effects on mRNA, protein, and enzyme activity in  
550 postmortem human brain. *Am J Hum Genet*. Nov 2004;75(5):807-821.
- 551 15. Mannisto PT, Kaakkola S. Catechol-O-methyltransferase (COMT): biochemistry,  
552 molecular biology, pharmacology, and clinical efficacy of the new selective COMT  
553 inhibitors. *Pharmacol Rev*. Dec 1999;51(4):593-628.
- 554 16. Zhu BT. On the mechanism of homocysteine pathophysiology and pathogenesis: a  
555 unifying hypothesis. *Histol Histopathol*. Oct 2002;17(4):1283-1291.
- 556 17. Ghimire LV, Kohli U, Li C, et al. Catecholamine pathway gene variation is associated with  
557 norepinephrine and epinephrine concentrations at rest and after exercise.  
558 *Pharmacogenet Genomics*. Apr 2012;22(4):254-260.
- 559 18. Haase-Fielitz A, Haase M, Bellomo R, et al. Decreased catecholamine degradation  
560 associates with shock and kidney injury after cardiac surgery. *J Am Soc Nephrol*. Jun  
561 2009;20(6):1393-1403.
- 562 19. Hall KT, Lembo AJ, Kirsch I, et al. Catechol-O-methyltransferase val158met  
563 polymorphism predicts placebo effect in irritable bowel syndrome. *PloS one*.  
564 2012;7(10):e48135.

- 565 20. Mangel AW, Hahn BA, Heath AT, et al. Adequate relief as an endpoint in clinical trials in  
566 irritable bowel syndrome. *The Journal of international medical research*. Mar-Apr  
567 1998;26(2):76-81.
- 568 21. Camilleri M, Chey WY, Mayer EA, et al. A randomized controlled clinical trial of the  
569 serotonin type 3 receptor antagonist alosetron in women with diarrhea-predominant  
570 irritable bowel syndrome. *Archives of internal medicine*. Jul 23 2001;161(14):1733-1740.
- 571 22. Novick J, Miner P, Krause R, et al. A randomized, double-blind, placebo-controlled trial  
572 of tegaserod in female patients suffering from irritable bowel syndrome with  
573 constipation. *Alimentary pharmacology & therapeutics*. Nov 2002;16(11):1877-1888.
- 574 23. Camilleri M, Mangel AW, Fehnel SE, Drossman DA, Mayer EA, Talley NJ. Primary  
575 endpoints for irritable bowel syndrome trials: a review of performance of endpoints.  
576 *Clin Gastroenterol Hepatol*. May 2007;5(5):534-540.
- 577 24. Ameen VZ, Heath AT, McSorley D, Spiegel BM, Chang L. Global measure of adequate  
578 relief predicts clinically important difference in pain and is independent of baseline pain  
579 severity in irritable bowel syndrome. *Gastroenterology*. 2007;2007;132(4  
580 (Supplement)):A140.
- 581 25. Spiegel B, Camilleri M, Bolus R, et al. Psychometric evaluation of patient-reported  
582 outcomes in irritable bowel syndrome randomized controlled trials: a Rome Foundation  
583 report. *Gastroenterology*. Dec 2009;137(6):1944-1953 e1941-1943.
- 584 26. Mohammad S, Di Lorenzo C, Youssef NN, et al. Assessment of abdominal pain through  
585 global outcomes and recent FDA recommendations in children: are we ready for  
586 change? *Journal of pediatric gastroenterology and nutrition*. Jan 2014;58(1):46-50.

- 587 27. Butbul Aviel Y, Stremler R, Benseler SM, et al. Sleep and fatigue and the relationship to  
588 pain, disease activity and quality of life in juvenile idiopathic arthritis and juvenile  
589 dermatomyositis. *Rheumatology (Oxford)*. Nov 2011;50(11):2051-2060.
- 590 28. Haverman L, Grootenhuis MA, van den Berg JM, et al. Predictors of health-related  
591 quality of life in children and adolescents with juvenile idiopathic arthritis: Results from  
592 a web-based survey. *Arthritis care & research*. Jan 11 2012;64(5):694-703.
- 593 29. Vlieger AM, Rutten JM, Govers AM, Frankenhuis C, Benninga MA. Long-Term Follow-Up  
594 of Gut-Directed Hypnotherapy vs. Standard Care in Children With Functional Abdominal  
595 Pain or Irritable Bowel Syndrome. *The American journal of gastroenterology*. Feb 7  
596 2012;107:627-631.
- 597 30. Amanzio M, Corazzini LL, Vase L, Benedetti F. A systematic review of adverse events in  
598 placebo groups of anti-migraine clinical trials. *Pain*. Dec 2009;146(3):261-269.
- 599 31. Benedetti F, Amanzio M. The placebo response: How words and rituals change the  
600 patient's brain. *Patient education and counseling*. May 26 2011;84(3):413-419.
- 601 32. Cloud J. The Flip Side of Placebos: The Nocebo Effect. *Time*. 2009. Accessed June 27,  
602 2011.
- 603
